# Supplementary material for: An efficient solvent-free synthesis of bis(indolyl)methane-based naked eye chemosensor for Cu2+ion from β-chloro-α,β-unsaturated aldehydes using PMA-Cellulose as a solid phase reusable catalyst
Source: Royal Society of Chemistry journal article supplement (doi:10.1039/c5ra09802e), 2015-01-01
Supplement: c5ra09802e1.pdf [file c5ra09802e1.pdf]

## **An efficient solvent-free synthesis of bis(indolyl)methane-based naked eye chemosensor for Cu<sup>2+</sup> ion from β-chloro-α,β-unsaturated aldehydes using PMA-Cellulose as solid phase reusable catalyst**

Arijit Kundu<sup>a</sup>, Aniruddha Ganguly<sup>b</sup>, Kaliprasanna Dhara<sup>b\*</sup>, Prasanta Patra<sup>c</sup> and Nikhil Guchhait<sup>b</sup>

<sup>a</sup> Department of Chemistry, Maulana Azad College, Kolkata-700013, India

<sup>b</sup> Department of Chemistry, University College of Science and Technology, University of Calcutta, Kolkata-700009, India.

<sup>c</sup> Department of Chemistry, Jhargram Raj College, Paschim Mednipur-721507, India.

### **Supplementary Information**

| <b>S. L. No.</b> | <b>Contents</b>                                                                                                                                           | <b>Page</b>    |
|------------------|-----------------------------------------------------------------------------------------------------------------------------------------------------------|----------------|
| 1.               | Instrumental Details                                                                                                                                      | <b>S2</b>      |
| 2.               | Comparative IR patterns of Cellulose, Phosphomolybdic Acid (PMA), PMA-Cellulose                                                                           | <b>S3</b>      |
| 3.               | Table for frequency of bands assigned to catalyst PMA as observed in both PMA and PMA-Cellulose                                                           | <b>S3</b>      |
| 4.               | Comparative XRD patterns of Cellulose, PMA, PMA-Cellulose and reused PMA-Cellulose                                                                        | <b>S4</b>      |
| 5.               | Kinetic measurement graph between reaction time and % of yield of the product                                                                             | <b>S4</b>      |
| 6.               | Image of Colour change of compound <b>4e</b> in presence of different metal ions and interference of other metal ions in presence of Cu <sup>2+</sup> ion | <b>S5</b>      |
| 7.               | Binding constant curve and Limit of detection curve of compound <b>4e</b>                                                                                 | <b>S5</b>      |
| 8.               | Comparison of emission spectra of compound <b>7</b> and <b>4a</b> in presence and absence of Cu <sup>2+</sup> ion                                         | <b>S6</b>      |
| 9.               | Spectral data analysis of <b>3a-h</b> , <b>4a-h</b> , <b>5a-d</b> and <b>6a-d</b>                                                                         | <b>S6-S11</b>  |
| 10.              | Copies of <sup>1</sup> H NMR and <sup>13</sup> C NMR Spectra of the products                                                                              | <b>S12-S24</b> |

## 1. Experimental

### General methods

Melting points were determined in open capillary tubes on Kofler block apparatus and are uncorrected. IR spectra were recorded in  $\text{cm}^{-1}$  using KBr discs with a Perkin Elmer RXI FTIR spectrophotometer. NMR spectra ( $^1\text{H}$ ,  $^{13}\text{C}$ ) were recorded in  $\text{CDCl}_3$  or  $\text{DMSO-D}_6$  solution in 5 mm BBO probe fitted with a pulse field gradient and working with Topspin 1.3 programme in a Bruker AV-300 Supercon NMR spectrometer (chemical shifts in  $\delta$  ppm and  $J$  in Hz). Hitachi UV-vis U-3501 spectrometer was used for recording UV/VIS spectra in HPLC grade Acetonitrile solution in the order of  $10^{-5}$  mol  $\text{L}^{-1}$  concentration at room temperature. Perkin-Elmer LS-55 was used for recording fluorescence spectra using aforesaid solution with similar concentration. Field emission scanning electron microscopy (FESEM) was used to observe the surface morphology (both unused and used PMA-Cellulose) and elemental detection of PMA-Cellulose. Previously, the samples were coated with a thin layer of gold to avoid electrical charging during examination. Zeiss Auriga instrument was used for FESEM study. X-ray diffraction analysis of cellulose, phosphomolybdic acid and PMA-Cellulose were performed at room temperature by X-PERT-PRO Pan analytical diffractometer using  $\text{Cu K}\alpha$  ( $\lambda = 1.5406$ ) as X-ray source of current 30 mA at a generator voltage of 40 kV. The rate of scanning was  $1^\circ \text{min}^{-1}$ . ICP-Mass data was collected from Geological survey of India, Central Chemical Laboratory, Kolkata. X-ray crystallographic data were taken on a Bruker Smart Apex 2 diffractometer equipped with a CCD area detector with graphite monochromatized  $\text{Mo K}\alpha$  radiation. Further information on the crystal structure investigations may be obtained from Cambridge Crystallographic Data Center CCDC, 12 Union Road, Cambridge CB2 1EZ, UK, fax (+44-(0)1223-336033 or email: ([deposit@ccdc.cam.ac.uk](mailto:deposit@ccdc.cam.ac.uk)) on quoting the depository numbers 986120 for  $\text{C}_{25} \text{H}_{18} \text{Br}_1 \text{Cl}_1 \text{N}_2$  (**3b**).

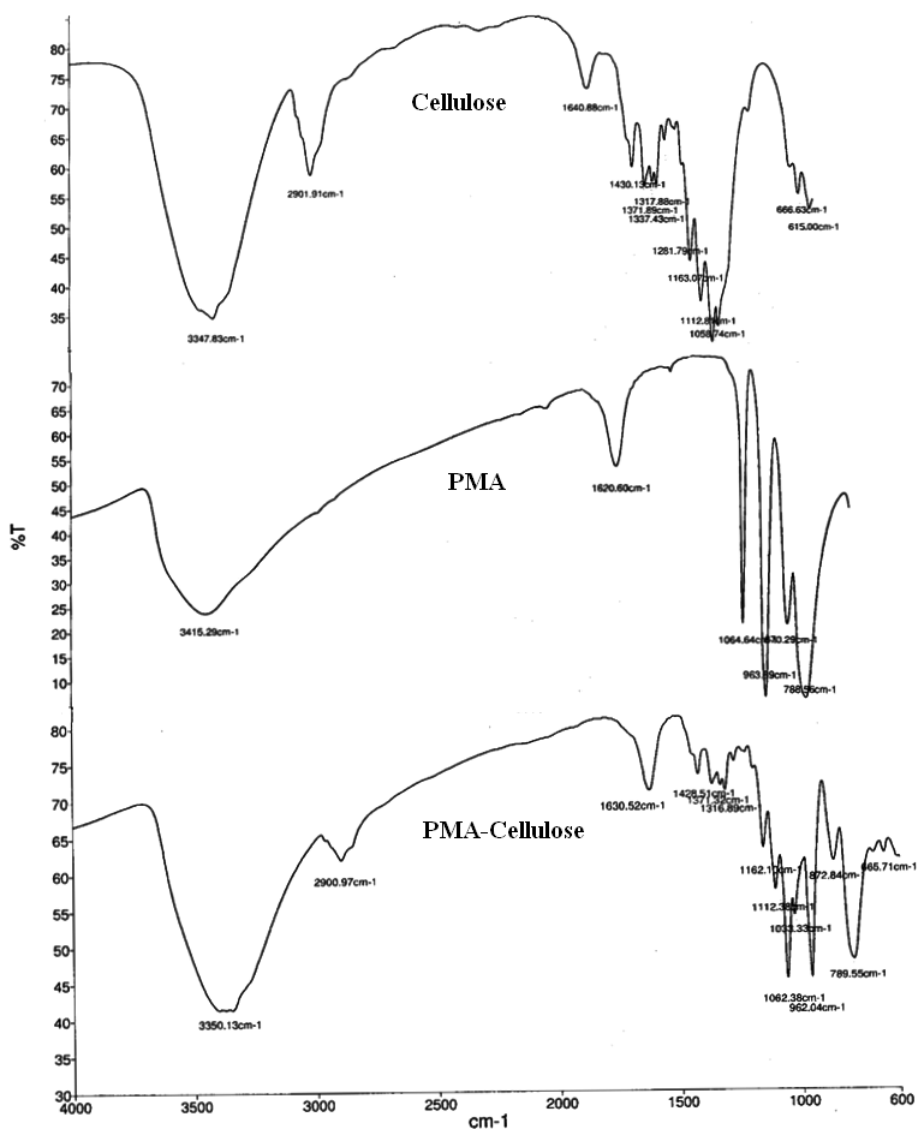

**Figure S1:** Comparative IR patterns of Cellulose, Phosphomolybdic Acid (PMA), PMA-Cellulose

**Table S1:** Frequency of bands assigned to catalyst PMA as observed in both PMA and PMA-Cellulose

| Assignment               | PMA  | PMA-Cellulose |
|--------------------------|------|---------------|
| $\nu_4$ P-O              | 1064 | 1062          |
| $\nu_3$ Mo=O terminal    | 963  | 962           |
| $\nu_2$ Mo-O-Mo-O Corner | 870  | 872           |
| $\nu_1$ Mo-o-Mo axis     | 788  | 789           |

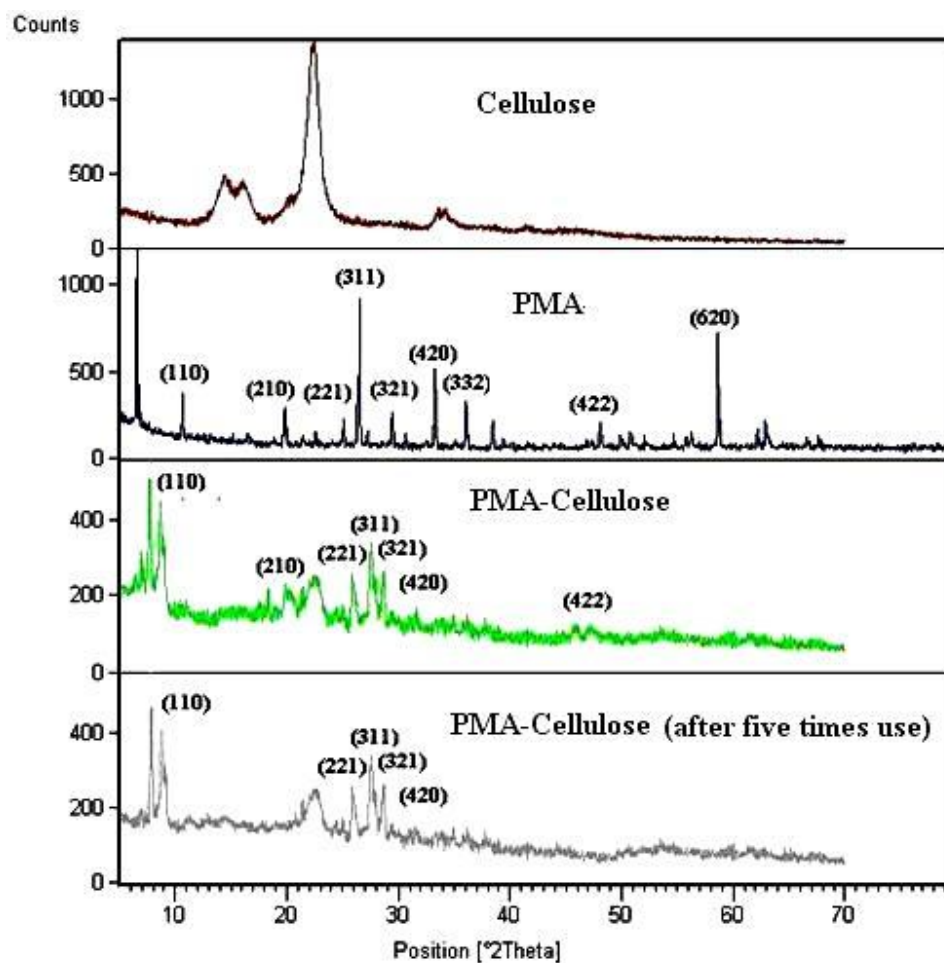

**Figure S2:** Comparative XRD patterns of Cellulose, PMA, PMA-Cellulose and reused PMA-Cellulose

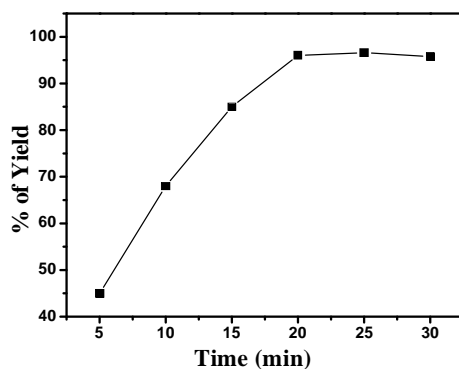

**Figure S3:** Kinetic measurement graph between reaction time and % of yield of the product

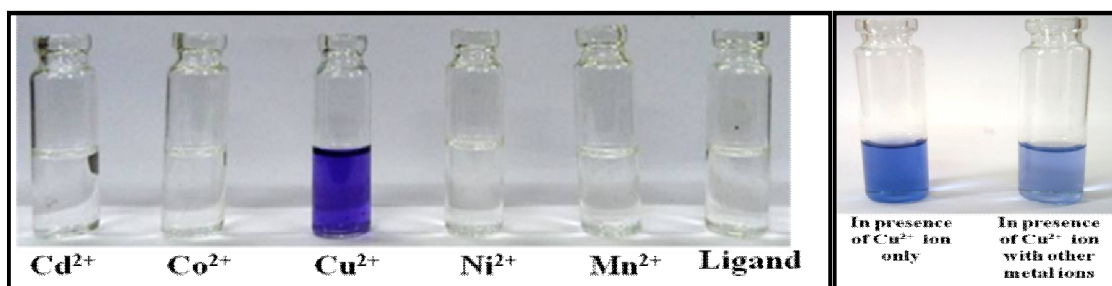

(a)

(b)

**Fig S4 (a):** Colour change of compound **4e** in presence of different metal ions (**4d** also give similar observation). **(b)** Study of the interference of other metal ions in presence of Cu<sup>2+</sup> ion

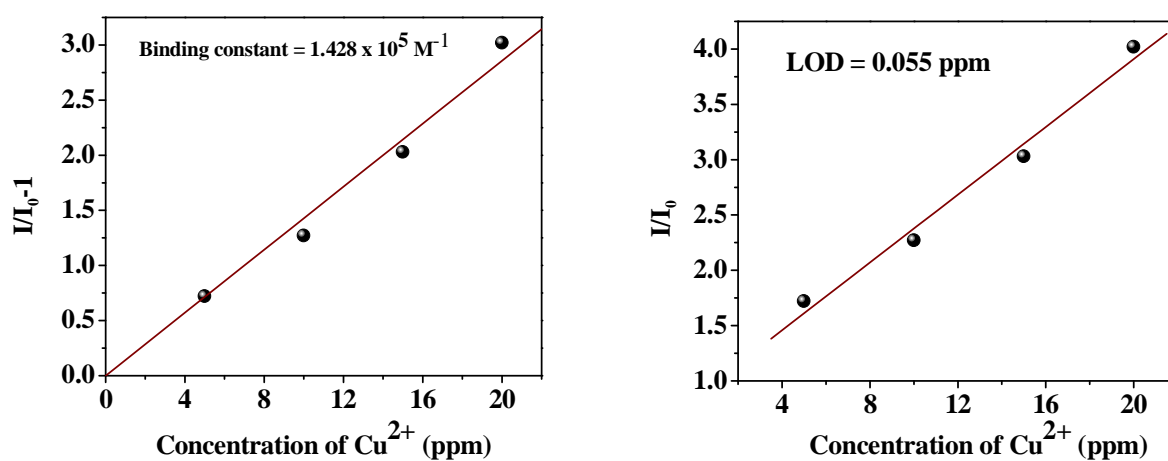

**Fig S5 : (a)** The Binding constant curve with  $K_b = 1.428 \times 10^5 \text{ M}^{-1}$  of compound **4e**

**(b)** The Limit of detection curve with  $\text{LOD} = 0.055 \text{ ppm}$  of compound **4e**

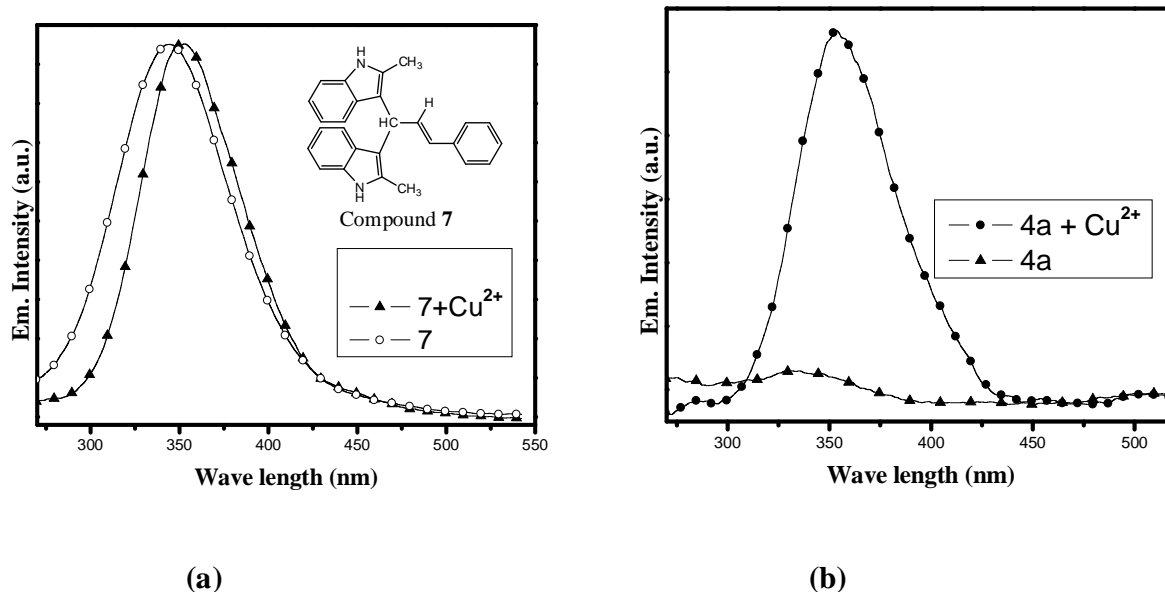

**Fig S6:** (a) Emission spectra of compound **7** in presence and absence of  $\text{Cu}^{2+}$  ion ( $\lambda_{\text{max}}=350$  nm)

(b) Emission spectra of compound **4a** in presence and absence of  $\text{Cu}^{2+}$  ion ( $\lambda_{\text{max}}=336$  nm)

**(Z)-3, 3'-(3-chloro-3-phenylprop-2-ene-1,1-diyl)bis(1H-indole) (3a)**

Yield: 96%, (0.366 g); m.p. 60–62°C characteristics: white solid; IR  $\nu_{\text{max}}$  (KBr) 3455, 1507, 1454, 1386;  $^1\text{H}$  NMR (300 MHz,  $\text{CDCl}_3$ )  $\delta_{\text{H}}$  5.89 (1H, d,  $J=10.2$  Hz), 6.72 (1H, d,  $J=9.6$  Hz), 6.93-6.95 (2H, m), 7.05-7.13 (2H, m), 7.17-7.24 (2H, m), 7.29-7.40 (5H, m), 7.58-7.69 (4H, m), 7.93 (2H, s);  $^{13}\text{C}$  NMR (75 MHz,  $\text{CDCl}_3$ )  $\delta_{\text{C}}$  34.9, 60.1, 110.7, 110.8, 119.0, 119.4, 119.6, 121.6, 121.8, 123.8, 126.3, 126.6, 127.9, 128.1, 128.3, 128.5, 128.9, 129.4, 129.1, 136.3; analysis calculated for  $\text{C}_{25}\text{H}_{19}\text{ClN}_2$ : C: 78.42; H: 5.00; N: 7.32% found C: 78.40; H: 5.02; N: 7.31%.

**(Z)-3,3'-(3-chloro-3-(4-chlorophenyl)prop-2-ene-1,1-diyl)bis(1H-indole) (3c)**

Yield: 90%, (0.375 g); m.p. 155–156°C characteristics: white crystalline solid (from Pet. Ether Chloroform mix); IR  $\nu_{\text{max}}$  (KBr) 3453, 1483, 1455, 1416, 1338, 1237, 1087, 1011, 755, 740;  $^1\text{H}$  NMR (300 MHz,  $\text{CDCl}_3$ )  $\delta_{\text{H}}$  5.87 (1H, d,  $J=9.6$  Hz), 6.70 (1H, d,  $J=9.5$  Hz), 6.93-6.95 (2H, m), 7.06-7.14 (2H, m), 7.18-7.22 (2H, m), 7.24-7.30 (2H, m), 7.38 (2H, d,  $J=8.1$  Hz), 7.48-7.56 (2H, m), 7.65 (2H, d,  $J=7.9$  Hz), 7.90 (2H, s);  $^{13}\text{C}$  NMR (75 MHz,  $\text{CDCl}_3$ )  $\delta_{\text{C}}$  35.4, 111.2, 117.3, 119.5, 122.1, 126.8, 127.9, 128.0, 128.5, 130.8, 134.3, 136.7; analysis calculated for  $\text{C}_{25}\text{H}_{18}\text{Cl}_2\text{N}_2$ : C: 71.95; H: 4.35; N: 6.71% found C: 71.96; H: 4.33; N: 6.72%.

**(Z)-3,3'-(3-chloro-3-(4-methoxyphenyl)prop-2-ene-1,1-diyl)bis(1H-indole) (3d)**

Yield: 92%, (0.379 g); m.p. 146–147°C characteristics: white solid; IR  $\nu_{\max}$  (KBr) 3446, 1601, 1508, 1455, 1418, 1337, 1254 1180, 1093, 1029, 831, 755;  $^1\text{H}$  NMR (300 MHz, DMSO- $\text{D}_6$ )  $\delta_{\text{H}}$  3.76(3H, s), 5.74 (1H,d, J= 9.9 Hz), 6.90-6.96 (5H, m), 7.06 (2H, t, J= 7.6 Hz), 7.23-7.24 (2H, m), 7.37 (2H, d, J=8.1 Hz), 7.54-7.61 (4H, m), 10.89 (2H, s);  $^{13}\text{C}$  NMR (75MHz,  $\text{CDCl}_3$ )  $\delta_{\text{C}}$  34.9, 55.3, 111.6, 113.8, 113.9, 116.3, 118.4, 119.0, 121.0, 122.7, 126.5, 127.7, 127.8, 128.9, 129.8, 129.9, 136.7, 159.6; analysis calculated for  $\text{C}_{26}\text{H}_{21}\text{ClN}_2\text{O}$ : C: 75.63; H: 5.13; N: 6.78% found C: 75.62; H: 5.12; N: 6.80%.

**(Z)-3,3'-(3-chloro-3-(4-nitrophenyl)prop-2-ene-1,1-diyl)bis(1H-indole) (3e)**

Yield: 95%, (0.406 g); m.p. 160–162°C characteristics: yellow solid; IR  $\nu_{\max}$  (KBr) 3434, 3057, 2346, 1593, 1512, 1485;  $^1\text{H}$  NMR (300 MHz,  $\text{CDCl}_3$ )  $\delta_{\text{H}}$  5.76 (1H, d, J= 9.6 Hz), 6.78-6.95 (5H,m), 7.01-7.05 (2H, m), 7.20-7.28 (2H, m), 7.46-7.60 (4H, m), 7.99 (2H, d, J= 7.5 Hz), 9.32 (2H, s);  $^{13}\text{C}$  NMR (75 MHz,  $\text{CDCl}_3$ )  $\delta_{\text{C}}$  35.6, 115.9, 118.9, 120.0, 122.0, 122.4, 122.7, 124.3, 126.6, 127.8, 129.1, 134.4, 136.8, 144.1, 147.2; analysis calculated for  $\text{C}_{25}\text{H}_{18}\text{ClN}_3\text{O}_2$ : C: 70.18; H: 4.24; N: 9.82% found C: 70.17; H: 4.23; N: 9.81%.

**(Z)-3,3'-(3-chloro-3-(3-nitrophenyl)prop-2-ene-1,1-diyl)bis(1H-indole) (3f)**

Yield: 96%, (0.410 g); m.p. 107–108°C characteristics: yellow solid; IR  $\nu_{\max}$  (KBr) 3049, 1721, 1617, 1527, 1455, 1416, 1348;  $^1\text{H}$  NMR (300 MHz,  $\text{CDCl}_3$ )  $\delta_{\text{H}}$  5.86 (1H, d, J=9.3 Hz), 6.80 (1H, d, J= 9.6 Hz), 6.83-6.88 (2H, m), 7.03-7.09 (2H, m), 7.13-7.21 (3H, m), 7.26-7.38 (3H, m), 7.60 (2H, d, J=7.8 Hz), 7.73-7.78 (1H, m), 7.90 (2H, s), 8.01-8.08 (1H, m);  $^{13}\text{C}$  NMR (75 MHz,  $\text{CDCl}_3$ )  $\delta_{\text{C}}$  37.4, 102.4, 111.0, 111.3, 116.6, 119.2, 119.4, 119.6, 119.9, 120.1, 120.6, 120.8, 121.3, 121.4, 121.5, 121.8, 122.1, 122.3, 122.5, 122.7, 122.9, 123.3, 123.4, 124.1, 125.2, 126.2, 126.6, 128.2, 128.9, 129.2, 129.3, 129.8, 130.2, 132.2, 132.8, 134.8, 135.2, 136.6, 139.6, 147.8, 148.1; analysis calculated for  $\text{C}_{25}\text{H}_{18}\text{ClN}_3\text{O}_2$ : C: 70.18; H: 4.24; N: 9.82% found C: 70.20; H: 4.23; N: 9.80%.

**(Z)-3,3'-(3-chloro-3-(p-tolyl)prop-2-ene-1,1-diyl)bis(1H-indole) (3g)**

Yield: 90%, (0.356 g); m.p. 118–120 °C characteristics: white solid; IR  $\nu_{\max}$  (KBr) 3455, 3402, 1507, 1454, 1416, 1336, 1246, 1093, 1011;  $^1\text{H}$  NMR (300 MHz,  $\text{CDCl}_3$ )  $\delta_{\text{H}}$  2.34 (3H,s), 5.87 (1H, d, J= 9.6 Hz), 6.67 (1H, d, J= 9.48 Hz), 6.94 (2H, s), 7.05-7.26 (9H, m), 7.34-7.38 (1H,m), 7.50 (1H, d, J= 7.27 Hz), 7.64 (1H, d, J= 7.96 Hz), 7.92 (2H, br.s.);  $^{13}\text{C}$  NMR (75 MHz,  $\text{CDCl}_3$ )  $\delta_{\text{C}}$  20.7, 34.9, 102.2, 110.6, 110.8, 117.3, 118.9, 119.4, 119.7, 120.3, 121.6, 121.8, 126.2, 126.6, 128.5, 128.9, 131.6, 136.3, 138.0; analysis calculated for  $\text{C}_{26}\text{H}_{21}\text{ClN}_2$ : C: 78.68; H: 5.33; N: 7.06% found C: 78.67; H: 5.32; N: 7.08%.

**(Z)-3,3'-(3-chloro-2-methyl-3-phenylprop-2-ene-1,1-diyl)bis(1H-indole) (3h)**

Yield: 94%, (0.372g); m.p. 128–129 °C characteristics: white solid; IR  $\nu_{\max}$  (KBr) 3416, 3054, 2367, 1617, 1454, 1416, 1386, 1216, 1092, 1011;  $^1\text{H}$  NMR (300 MHz,  $\text{CDCl}_3$ )  $\delta_{\text{H}}$  2.00 (3H, s), 5.58 (1H, s), 6.84 (2H, s), 7.00-7.03 (2H, t,  $J=7.6$  Hz), 7.13-7.37 (9H, m), 7.44-7.46 (2H, m), 7.94 (2H, s);  $^{13}\text{C}$  NMR (75 MHz,  $\text{CDCl}_3$ )  $\delta_{\text{C}}$  13.3, 39.3, 112.2, 117.3, 118.9, 120.3, 120.9, 122.0, 122.2, 124.4, 126.9, 127.8, 128.2, 129.4, 129.8, 135.6, 136.5, 138.9; analysis calculated for  $\text{C}_{26}\text{H}_{21}\text{ClN}_2$ : C: 78.68; H: 5.33; N: 7.06% found C: 78.66; H: 5.31; N: 7.07%.

**(Z)-3,3'-(3-chloro-3-phenylprop-2-ene-1,1-diyl)bis(2-methyl-1H-indole) (4a)**

Yield: 97%, (0.398g); m.p. 118-119°C characteristics: white solid; IR  $\nu_{\max}$  (KBr) 3437, 3406, 1456, 1443, 1296, 1240, 1016, 893;  $^1\text{H}$  NMR (300 MHz,  $\text{DMSO-D}_6$ )  $\delta_{\text{H}}$  2.13 (6H, s), 5.59 (1H, d,  $J=9.6$  Hz), 6.61 (2H, t,  $J=7.4$  Hz), 6.74 (2H, t,  $J=7.4$  Hz), 6.93 (1H, d,  $J=9.6$  Hz), 7.04-7.17 (7H, m), 7.43 (2H, d,  $J=7.2$  Hz), 10.59 (2H, s);  $^{13}\text{C}$  NMR (75MHz,  $\text{DMSO-D}_6$ )  $\delta_{\text{C}}$  12.8, 35.5, 111.0, 111.3, 118.7, 118.8, 120.3, 126.5, 128.3, 129.0, 129.1, 129.9, 131.3, 132.1, 135.7, 137.6; analysis calculated for  $\text{C}_{27}\text{H}_{23}\text{ClN}_2$ : C: 78.91; H: 5.64; N: 6.82% found C: 78.90; H: 5.66; N: 6.81%.

**(Z)-3,3'-(3-(4-bromophenyl)-3-chloroprop-2-ene-1,1-diyl)bis(2-methyl-1H-indole) (4b)**

Yield: 95%, (0.465g); m.p. 180-181°C characteristics: red solid; IR  $\nu_{\max}$  (KBr) 3445, 3397, 1484, 1462, 1294, 1006, 738;  $^1\text{H}$  NMR (300 MHz,  $\text{DMSO-D}_6$ )  $\delta_{\text{H}}$  2.29 (6H, s), 5.72 (1H, d,  $J=9.3$  Hz), 6.76-6.80 (2H, m), 6.90-6.94 (2H, m), 7.16-7.26 (5H, m), 7.57 (4H, s), 10.79 (2H, s);  $^{13}\text{C}$  NMR (75MHz,  $\text{CDCl}_3$ )  $\delta_{\text{C}}$  12.1, 34.9, 109.9, 111.0, 112.0, 117.7, 119.2, 119.3, 119.6, 119.7, 121.3, 121.4, 122.1, 122.2, 127.4, 128.2, 128.8, 129.6, 131.0, 132.1, 133.1, 135.6, 136.7; analysis calculated for  $\text{C}_{27}\text{H}_{22}\text{BrClN}_2$  for C: 66.20; H: 4.53; N: 5.72% found C: 66.22; H: 4.51; N: 5.71%.

**(Z)-3,3'-(3-chloro-3-(4-chlorophenyl)prop-2-ene-1,1-diyl)bis(2-methyl-1H-indole) (4c)**

Yield: 96%, (0.427g); m.p. 172-173°C characteristics: white crystalline solid (from Pet. Ether Chloroform mix); IR  $\nu_{\max}$  (KBr) 3380, 2919, 2368, 1485, 1459, 1340, 1303, 1242, 1092, 1009, 829, 750;  $^1\text{H}$  NMR (300 MHz,  $\text{DMSO-D}_6$ )  $\delta_{\text{H}}$  2.31 (6H, s), 5.75 (1H, d,  $J=9.3$  Hz), 6.79 (2H, t,  $J=7.2$  Hz), 6.94 (2H, t,  $J=7.2$  Hz), 7.17-7.28 (4H, m), 7.43 (2H, d,  $J=7.2$  Hz), 7.67 (2H, d,  $J=7.2$  Hz), 10.80 (2H, s);  $^{13}\text{C}$  NMR (75MHz,  $\text{DMSO-D}_6$ )  $\delta_{\text{C}}$  12.7, 35.5, 56.5, 110.9, 111.1, 118.6, 118.7, 120.3, 128.1, 128.2, 128.7, 129.1, 132.1, 133.6, 135.6, 136.3; analysis calculated for  $\text{C}_{27}\text{H}_{22}\text{Cl}_2\text{N}_2$ : C, 72.81; H, 4.98; Cl, 15.92; N, 6.29% found C: 72.83; H: 4.97; N: 6.28%.

**(Z)-3,3'-(3-chloro-3-(4-methoxyphenyl)prop-2-ene-1,1-diyl)bis(2-methyl-1H-indole) (4d)**

Yield: 97%, (0.428g); m.p. 162-163°C characteristics: bluish grey solid; IR  $\nu_{\max}$  (KBr) 3394, 2346, 1601, 1507, 1460, 1289, 1251, 1178, 1023, 834, 739;  $^1\text{H}$  NMR (300 MHz,  $\text{DMSO-D}_6$ )  $\delta_{\text{H}}$  2.23 (6H, s), 3.66 (3H, s), 5.65 (1H, d,  $J=9.6$  Hz), 6.71 (2H, t,  $J=7.5$  Hz), 6.83-6.92 (5H, m), 7.14-7.21 (4H, m), 7.49 (2H, d,  $J=8.7$  Hz), 10.70 (2H, s);  $^{13}\text{C}$  NMR (75MHz,  $\text{DMSO-D}_6$ )  $\delta_{\text{C}}$  12.7, 35.4, 55.7, 110.9,



111.5, 114.4, 118.7, 120.2, 127.7, 127.8, 127.9, 129.3, 129.6, 130.1, 131.9, 135.6, 159.93; analysis calculated for  $C_{28}H_{25}ClN_2O$ : C: 76.26; H: 5.71; N: 6.35% found C: 76.24; H: 5.73; N: 6.34%.

**(Z)-3,3'-(3-chloro-3-(4-nitrophenyl)prop-2-ene-1,1-diyl)bis(1H-indole) (4e)**

Yield: 96%, (0.438g); m.p. 130-131°C characteristics: yellow solid; IR  $\nu_{\max}$  (KBr) 3381, 1593, 1513, 1459, 1343, 849, 747;  $^1H$  NMR (300 MHz,  $CDCl_3$ )  $\delta_H$  2.25 (6H, s), 5.84 (1H, d,  $J=9.3$  Hz), 6.93 (2H, t,  $J=7.9$  Hz), 7.06 (2H, t,  $J=7.8$  Hz), 7.18 (1H, d,  $J=9.4$  Hz), 7.26 (3H, d,  $J=7.7$  Hz), 7.37 (2H, d,  $J=8$  Hz), 7.71-7.80 (4H, m), 8.13 (1H, s), 8.16 (1H, s);  $^{13}C$  NMR (75 MHz,  $CDCl_3$ )  $\delta_C$  18.4, 35.8, 58.5, 110.3, 111.5, 118.9, 119.4, 120.9, 123.6, 127.1, 128.3, 134.6, 135.2, 144.0; analysis calculated for  $C_{27}H_{22}ClN_3O_2$ : C: 71.13; H: 4.86; N: 9.22% found C: 71.14; H: 4.84; N: 9.21%.

**(Z)-3,3'-(3-chloro-3-(3-nitrophenyl)prop-2-ene-1,1-diyl)bis(2-methyl-1H-indole) (4f)**

Yield: 93%, (0.423g); m.p. 126-127°C characteristics: yellow solid; IR  $\nu_{\max}$  (KBr) 3387, 1527, 1459, 1347, 740;  $^1H$  NMR (300 MHz,  $CDCl_3$ )  $\delta_H$  2.30 (6H, s), 5.88 (1H, d,  $J=9.6$  Hz), 6.92-7.00 (2H, m), 7.05-7.18 (3H, m), 7.28-7.31 (2H, m), 7.4 (2H, d,  $J=7.8$  Hz), 7.46-7.54 (2H, m), 7.83 (1H, s), 7.88-7.95 (1H, m), 8.10-8.18 (1H, m), 8.46-8.51 (1H, m);  $^{13}C$  NMR (75 MHz,  $CDCl_3$ )  $\delta_C$  12.6, 35.7, 111.6, 119.4, 120.9, 128.3, 131.3, 135.2, 138.6, 148.7; analysis calculated for  $C_{27}H_{22}ClN_3O_2$ : C: 71.13; H: 4.86; N: 9.22% found C: 71.11; H: 4.88; N: 9.23%.

**(Z)-3,3'-(3-chloro-3-(p-tolyl)prop-2-ene-1,1-diyl)bis(2-methyl-1H-indole) (4g)**

Yield: 92%, (0.390g); m.p. 110-111°C characteristics: white solid; IR  $\nu_{\max}$  (KBr) 3380, 2919, 2368, 1485, 1459, 1303, 1092, 1009, 829;  $^1H$  NMR (300 MHz,  $CDCl_3$ )  $\delta_H$  2.27 (6H, s), 2.43 (3H, s), 5.84 (1H, d,  $J=9.6$  Hz), 6.91-6.95 (2H, m), 7.03-7.13 (4H, m), 7.22-7.29 (3H, m), 7.32-7.50 (4H, m), 7.51-7.77 (2H, m);  $^{13}C$  NMR (75 MHz,  $CDCl_3$ )  $\delta_C$  12.4, 13.8, 41.3, 109.8, 111.8, 120.2, 125.1, 125.9, 128.1, 128.4, 128.5, 128.6, 128.7, 129.2, 129.4, 130.9, 134.8, 134.9, 137.2, 137.7; analysis calculated for  $C_{28}H_{25}ClN_2$ : C: 79.14; H: 5.93; N: 6.59% found C: 79.15; H: 5.91; N: 6.57%.

**(Z)-3,3'-(3-chloro-2-methyl-3-phenylprop-2-ene-1,1-diyl)bis(2-methyl-1H-indole) (4h)**

Yield: 95%, (0.402g); m.p. 92-93°C characteristics: white solid; IR  $\nu_{\max}$  (KBr) 3399, 2917, 1711, 1617, 1459, 1373, 1332, 1300, 1231, 1014;  $^1H$  NMR (300 MHz,  $CDCl_3$ )  $\delta_H$  2.05 (6H, s), 2.20-2.26 (3H, m), 5.62 (1H, s), 7.03-7.13 (2H, m), 7.20-7.27 (3H, m), 7.33-7.38 (5H, m), 7.42-7.56 (3H, m), 7.76 (2H, s);  $^{13}C$  NMR (75 MHz,  $CDCl_3$ )  $\delta_C$  13.1, 13.6, 40.1, 109.2, 109.3, 111.4, 112.3, 118.3, 118.5, 119.7, 120.3, 121.7, 121.8, 127.3, 128.0, 128.7, 129.1, 129.3, 129.4, 130.0, 131.9, 135.2, 136.2, 136.7, 139.3, 139.4, 139.6; analysis calculated for  $C_{28}H_{25}ClN_2$ : C: 79.14; H: 5.93; N: 6.59% found C: 79.14; H: 5.92; N: 6.60%.

**3,3'-((1-chloro-3,4-dihydronaphthalen-2-yl)methylene)bis(1H-indole) (5a)**

Yield: 95%, (0.388g); m.p. 154-155°C characteristics: reddish white solid; IR  $\nu_{\max}$  (KBr) 3441, 3419, 1614, 1480, 1455, 1411, 1338, 1216, 1094, 1061, 957, 742;  $^1\text{H}$  NMR (300 MHz,  $\text{CDCl}_3$ )  $\delta_{\text{H}}$  2.27-2.36 (2H, m), 2.66-2.72 (2H, m), 6.30 (1H, s), 6.85 (2H, s), 7.00-7.08 (3H, m), 7.11- 7.20 (3H, m), 7.33-7.35 (3H, m), 7.59 (2H, d,  $J= 7.9$  Hz), 7.73 (1H, d,  $J= 7.6$  Hz), 7.9 (2H, s);  $^{13}\text{C}$  NMR (75 MHz,  $\text{CDCl}_3$ )  $\delta_{\text{C}}$  18.4, 26.6, 28.2, 38.2, 58.5, 111.1, 116.2, 119.2, 119.3, 119.4, 119.4, 120.0, 120.1, 122.1, 123.1, 124.1, 124.7, 125.9, 126.6, 126.9, 127.1, 127.2, 127.5, 133.8, 136.1, 136.6, 138.4; analysis calculated for  $\text{C}_{27}\text{H}_{21}\text{ClN}_2$ : C: 79.30; H: 5.18; N: 6.85% found C: 79.30; H: 5.17; N: 6.84%.

**3,3'-((1-chloro-5-methoxy-3,4-dihydronaphthalen-2-yl)methylene)bis(1H-indole) (5b)**

Yield: 92%, (0.403g); m.p. 132-133°C characteristics: gray solid; IR  $\nu_{\max}$  (KBr) 3416, 3379, 1573, 1459, 1433, 1336, 1355, 1291, 1266, 1221, 1094, 1009, 752;  $^1\text{H}$  NMR (300 MHz,  $\text{CDCl}_3$ )  $\delta_{\text{H}}$  2.20-2.26 (2H, m), 2.63-2.69 (2H, m), 3.73 (3H, s), 6.23 (1H, s), 6.75 (1H, d,  $J= 8.15$  Hz), 6.85 (2H, s), 6.98 (3H, t,  $J= 7.3$  Hz), 7.08-7.17 (3H, m), 7.27-7.36 (4H, m), 7.51 (1H, s), 7.54 (1H, s);  $^{13}\text{C}$  NMR (75 MHz,  $\text{CDCl}_3$ )  $\delta_{\text{C}}$  20.1, 26.1, 38.2, 55.7, 110.3, 111.0, 116.3, 117.6, 119.3, 120.1, 123.0, 124.3, 125.8, 126.6, 127.2, 134.9, 136.5, 138.4, 155.6; analysis calculated for  $\text{C}_{28}\text{H}_{23}\text{ClN}_2\text{O}$ : C: 76.61; H: 5.28; N: 6.38% found C: 76.62; H: 5.26; N: 6.37%.

**3,3'-((1-chloro-6-methoxy-3,4-dihydronaphthalen-2-yl)methylene)bis(1H-indole) (5c)**

Yield: 97%, (0.425g); m.p. 134-135°C characteristics: gray solid; IR  $\nu_{\max}$  (KBr) 3411, 1605, 1496, 1457, 1421, 1338, 1278, 1105, 1093, 1009, 1025, 885, 741;  $^1\text{H}$  NMR (300 MHz,  $\text{CDCl}_3$ )  $\delta_{\text{H}}$  2.32-2.37 (2H, m), 2.69-2.74 (2H, m), 3.82 (3H, s), 6.31 (1H, s), 6.66 (1H, s), 6.80-6.83 (1H, m), 6.92 (2H, br.s), 7.08 (2H, t,  $J= 7.2$  Hz), 7.22 (2H, t,  $J= 7.2$  Hz), 7.38 (2H, d,  $J= 8.1$  Hz), 7.41 (2H, d,  $J= 7.8$  Hz), 7.68 (1H, d,  $J= 8.2$  Hz), 7.94 (2H, br.s);  $^{13}\text{C}$  NMR (75 MHz,  $\text{CDCl}_3$ )  $\delta_{\text{C}}$  26.5, 28.6, 37.9, 55.3, 111.1, 113.1, 116.4, 119.3, 120.1, 122.0, 123.0, 125.6, 126.0, 126.9, 127.2, 135.5, 136.6, 137.8, 159.1; analysis calculated for  $\text{C}_{28}\text{H}_{23}\text{ClN}_2\text{O}$ : C: 76.61; H: 5.28; N: 6.38% found C: 76.60; H: 5.28; N: 6.37%.

**3,3'-((3-chloro-1H-inden-2-yl)methylene)bis(1H-indole) (5d)**

Yield: 90%, (0.354g); m.p. 143-144°C characteristics: brown solid; IR  $\nu_{\max}$  (KBr);  $^1\text{H}$  NMR (300 MHz,  $\text{CDCl}_3$ )  $\delta_{\text{H}}$  2.07-2.11 (2H, m), 6.16 (1H, s), 6.77 (2H, d,  $J= 2.1$  Hz), 7.03-7.10 (2H, m), 7.18-7.28 (4H, m), 7.29-7.35 (3H, m), 7.44-7.60 (3H, m), 7.87 (2H, s);  $^{13}\text{C}$  NMR (75 MHz,  $\text{CDCl}_3$ )  $\delta_{\text{C}}$  13.8, 33.1, 38.1, 60.2, 110.8, 110.9, 116.2, 116.7, 118.5, 118.8, 118.9, 119.1, 119.2, 119.4, 119.5, 119.6, 121.5, 121.7, 121.8, 122.5, 122.6, 123.3, 123.9, 125.1, 126.3, 126.5, 126.6, 127.9, 128.8, 130.1, 136.2, 136.3, 140.6, 142.3, 144.1; analysis calculated for  $\text{C}_{26}\text{H}_{19}\text{ClN}_2$ : C: 79.08; H: 4.85; N: 7.09% found C: 79.06; H: 4.86; N: 7.08%.

**3,3'-((1-chloro-3,4-dihydronaphthalen-2-yl)methylene)bis(2-methyl-1H-indole) (6a)**

Yield: 95%, (0.414g); m.p. 156-157°C characteristics: White solid; IR  $\nu_{\max}$  (KBr) 3418, 3378, 2924, 1614, 1423, 1484, 1461, 1423, 1338, 1295, 1244, 1219, 1010, 957, 752, 741;  $^1\text{H}$  NMR (300 MHz,  $\text{CDCl}_3$ )  $\delta_{\text{H}}$  2.02 (6H, s), 2.26-2.31 (2H, m), 2.60-2.63 (2H, m), 5.96 (1H, s), 6.63-6.68 (2H, m), 6.80-6.89 (3H, m), 6.95-7.10(5H, m), 7.19 (1H, br.s), 7.46 (1H, br.s), 8.84 (2H, s);  $^{13}\text{C}$  NMR (75 MHz,  $\text{CDCl}_3$ )  $\delta_{\text{C}}$  12.2, 27.0, 27.8, 109.8, 110.6, 118.1, 118.4, 119.9, 123.7, 125.4, 126.8, 127.3, 127.8, 128.6, 132.4, 132.9, 135.2, 135.4, 139.8; analysis calculated for  $\text{C}_{29}\text{H}_{25}\text{ClN}_2$ : C: 79.71; H: 5.77; N: 6.41% found C: 79.70; H: 5.78; N: 6.41%.

**3,3'-((1-chloro-5-methoxy-3,4-dihydronaphthalen-2-yl)methylene)bis(2-methyl-1H-indole) (6b)**

Yield: 90%, (0.420g); m.p. 139-140°C characteristics: White solid; IR  $\nu_{\max}$  (KBr) 3852, 2946, 2368, 1740, 1705, 1635, 1588, 1552, 1506, 1390  $^1\text{H}$  NMR (300 MHz,  $\text{CDCl}_3$ )  $\delta_{\text{H}}$  2.12 (6H, s), 2.33-2.39 (2H, m), 2.72-2.77 (2H, m), 3.73 (3H, s), 6.08 (1H, s), 6.73 (1H, d,  $J=8.1$  Hz), 6.81(2H, t,  $J=7.2$  Hz), 6.97 (3H, t,  $J=7.2$  Hz), 7.09-7.29 (5H, m), 7.70 (2H, s);  $^{13}\text{C}$  NMR (75 MHz,  $\text{CDCl}_3$ )  $\delta_{\text{C}}$  12.6, 19.8, 27.3, 38.8, 55.7, 109.9, 110.2, 111.3, 117.3, 119.2, 120.7, 123.8, 126.5, 129.1, 131.8, 134.7, 135.0, 138.8, 155.7; analysis calculated for  $\text{C}_{30}\text{H}_{27}\text{ClN}_2\text{O}$ : C: 77.16; H: 5.83; N: 6.00% found C: 77.18; H: 5.81; N: 6.00%.

**3,3'-((1-chloro-6-methoxy-3,4-dihydronaphthalen-2-yl)methylene)bis(2-methyl-1H-indole) (6c)**

Yield: 96%, (0.448g); m.p. 144-145°C characteristics: White solid; IR  $\nu_{\max}$  (KBr) 3855, 2944, 2367, 1742, 1701, 1631, 1586, 1555, 1508, 1389  $^1\text{H}$  NMR (300 MHz,  $\text{CDCl}_3$ )  $\delta_{\text{H}}$  2.11 (6H, s), 2.27-2.30 (2H, m), 2.66-2.69 (2H, m), 3.67 (3H, s), 5.94 (1H, s), 6.67-6.77 (3H, m), 6.87 (3H, t,  $J=7.5$  Hz), 7.00 (2H, d,  $J=7.8$  Hz), 7.12 (2H, d,  $J=7.8$  Hz), 7.41 (1H, d,  $J=8.7$ Hz), 10.73 (2H, s);  $^{13}\text{C}$  NMR (75 MHz,  $\text{CDCl}_3$ )  $\delta_{\text{C}}$  12.3, 18.8, 27.5, 27.7, 56.4, 110.1, 110.7, 111.7, 113.4, 118.3, 118.5, 119.3, 120.0, 125.1, 125.3, 126.0, 128.7, 132.4, 135.3, 136.8, 137.4, 159.1; analysis calculated for  $\text{C}_{30}\text{H}_{27}\text{ClN}_2\text{O}$ : C: 77.16; H: 5.83; N: 6.00% found C: 77.16; H: 5.82; N: 6.01%.

**3,3'-((3-chloro-1H-inden-2-yl)methylene)bis(2-methyl-1H-indole) (6d)**

Yield: 97%, (0.410g); m.p. 168-169°C characteristics: White solid; IR  $\nu_{\max}$  (KBr) 3403, 3385, 1458, 1423, 1386, 1337, 1305, 1281, 1242, 973, 753, 727;  $^1\text{H}$  NMR (300 MHz,  $\text{CDCl}_3$ )  $\delta_{\text{H}}$  2.04 (6H, s), 3.27-3.30 (2H, m), 5.93 (1H, s), 6.62-6.67 (2H, m), 6.83- 6.92 (4H, m), 7.04- 7.09 (1H, m), 7.14-7.19 (3H, m), 7.22-7.30 (2H, m), 9.70 (2H, brs);  $^{13}\text{C}$  NMR (75 MHz,  $\text{CDCl}_3$ )  $\delta_{\text{C}}$  11.5, 32.7, 109.6, 110.5, 117.7, 119.3, 122.9, 124.5, 125.5, 125.8, 127.7, 131.3, 134.6, 139.9, 141.8, 144; analysis calculated for  $\text{C}_{28}\text{H}_{23}\text{ClN}_2$ : C: 79.51; H: 5.48; N: 6.62% found C: 79.50; H: 5.49; N: 6.62%.

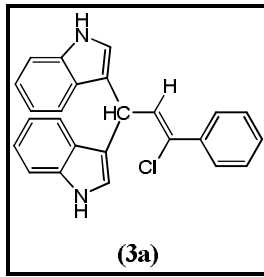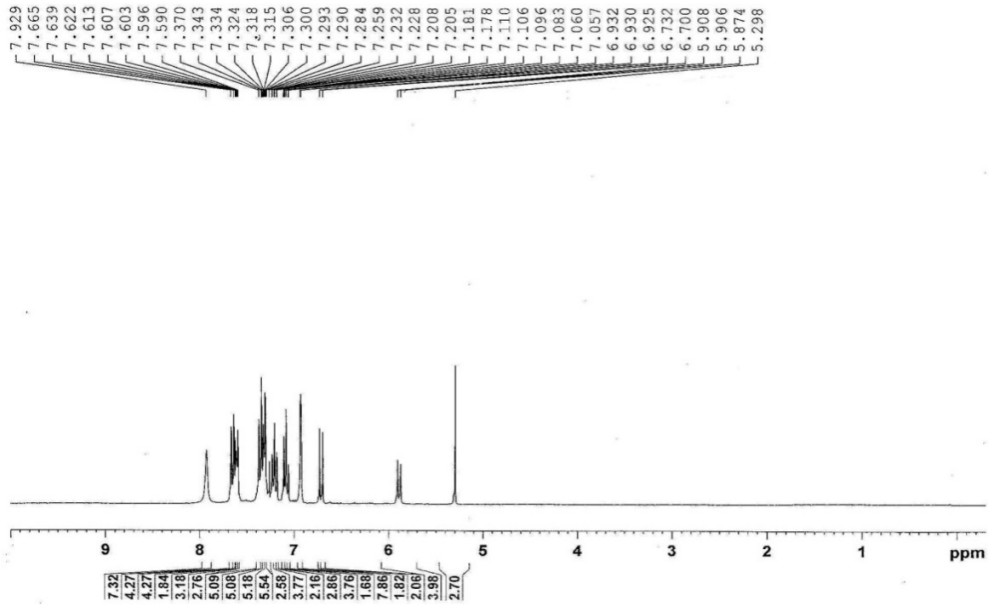

<sup>1</sup>H NMR, 300 MHz, CDCl<sub>3</sub>

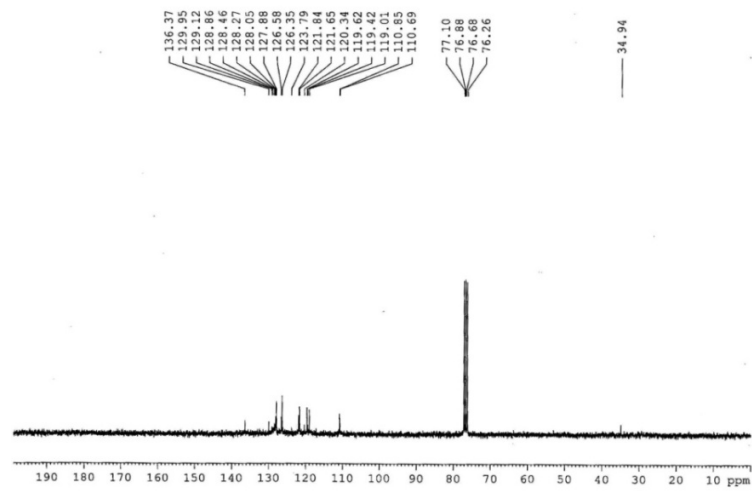

<sup>13</sup>C NMR, 75MHz, CDCl<sub>3</sub>

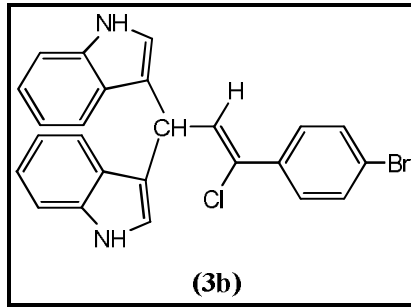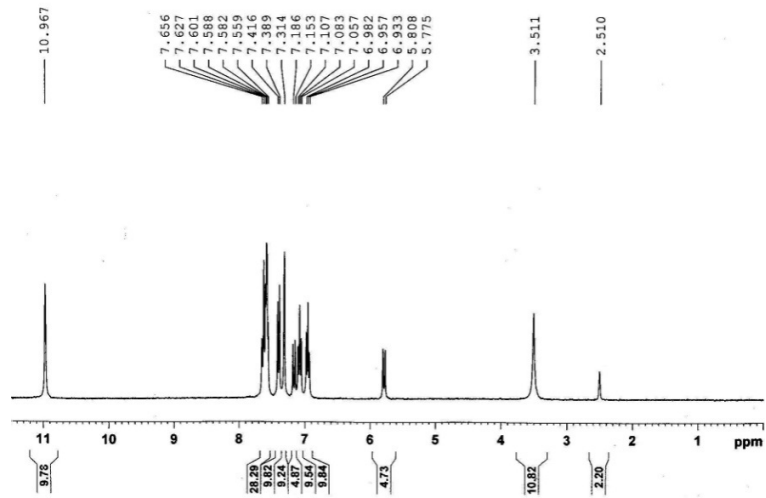

$^1\text{H}$  NMR, 300 MHz,  $\text{DMSO-D}_6$

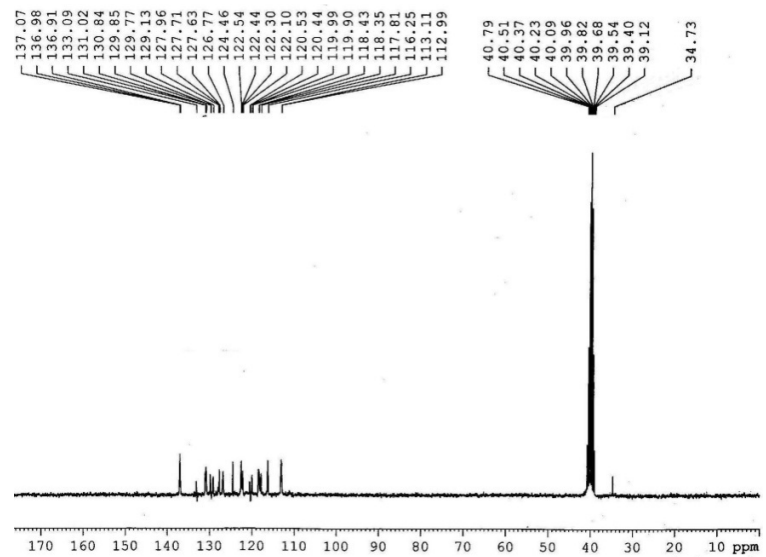

$^{13}\text{C}$  NMR, 75MHz,  $\text{DMSO-D}_6$

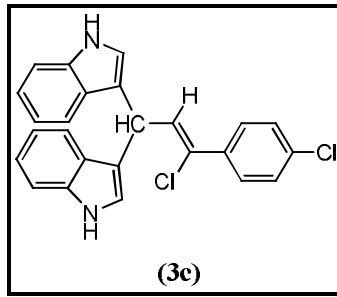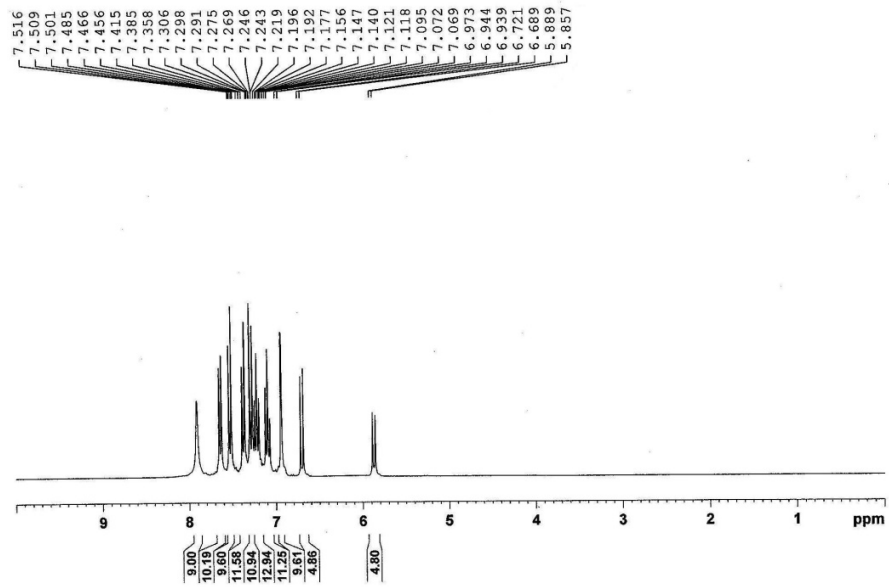

<sup>1</sup>H NMR, 300 MHz, CDCl<sub>3</sub>

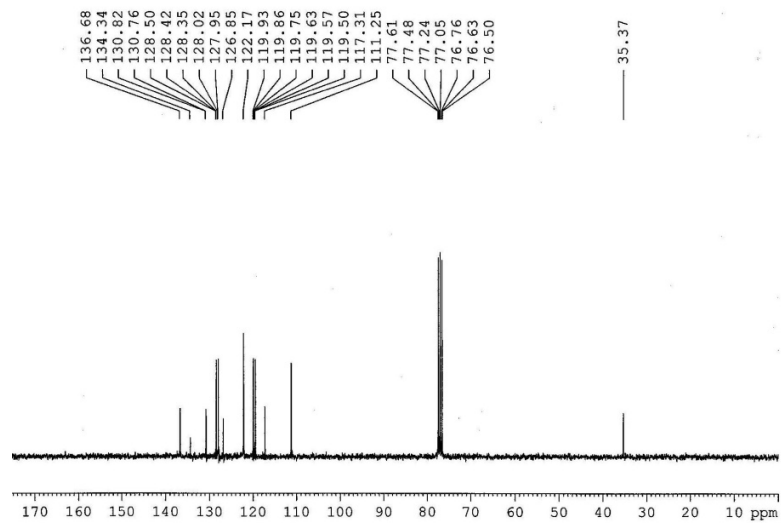

<sup>13</sup>C NMR, 75 MHz, CDCl<sub>3</sub>

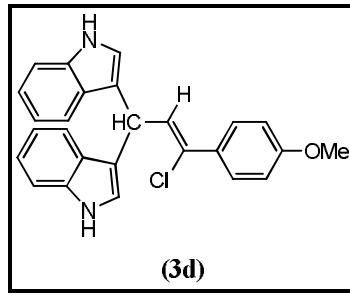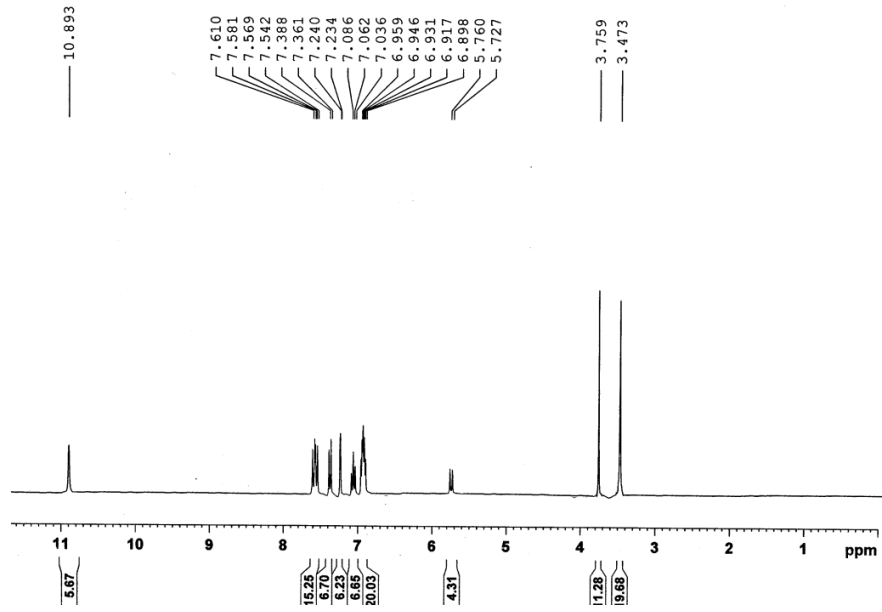

$^1\text{H}$  NMR, 300 MHz, DMSO- $\text{D}_6$

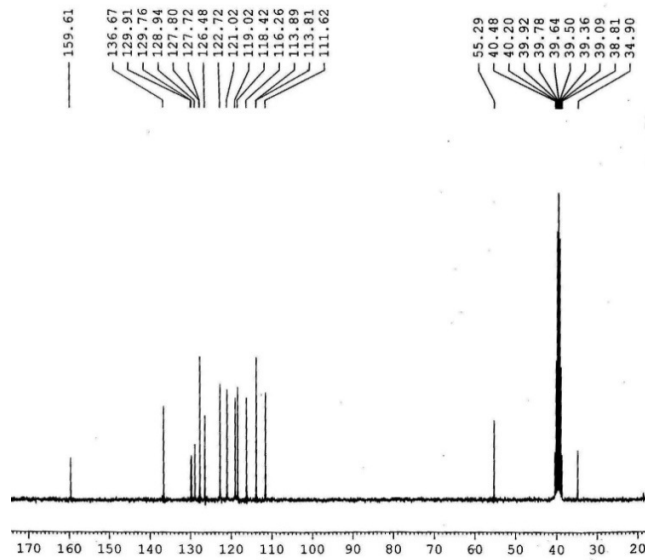

$^{13}\text{C}$  NMR, 75MHz, DMSO- $\text{D}_6$

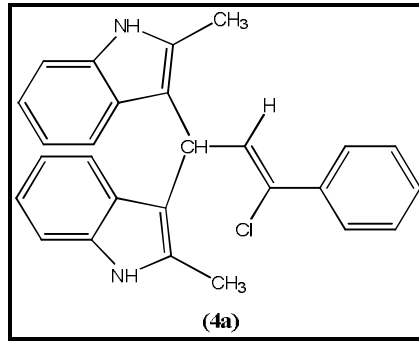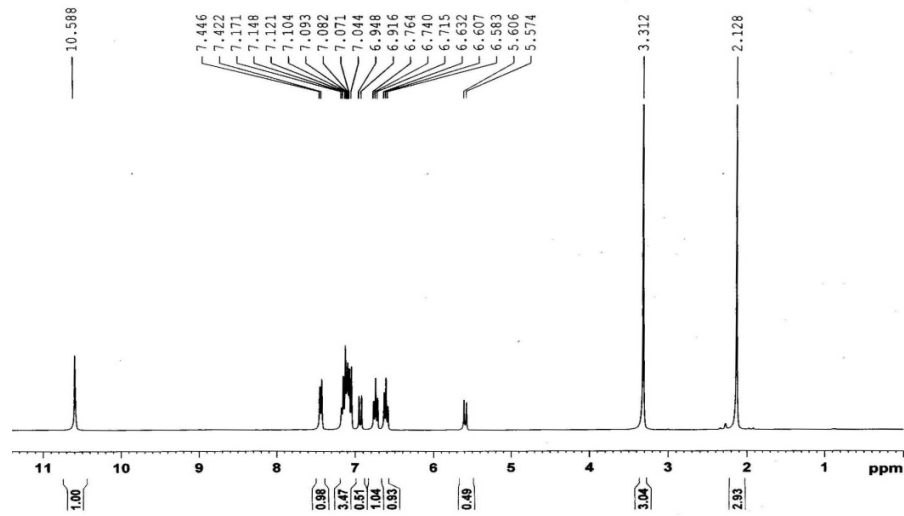

<sup>1</sup>H NMR, 300 MHz, DMSO-D<sub>6</sub>

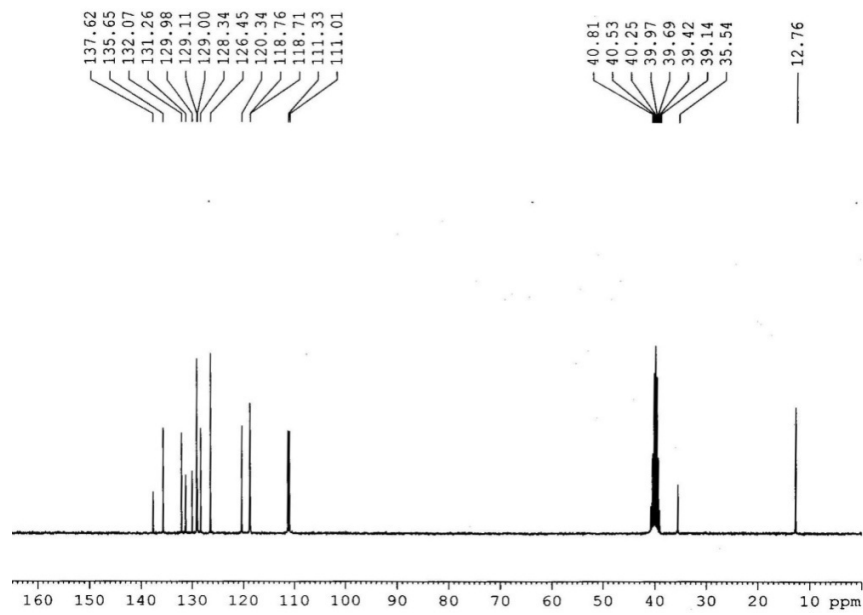

<sup>13</sup>C NMR, 75MHz, DMSO-D<sub>6</sub>



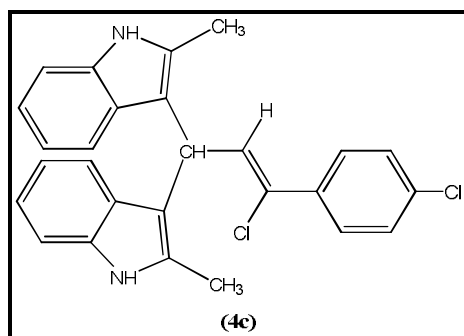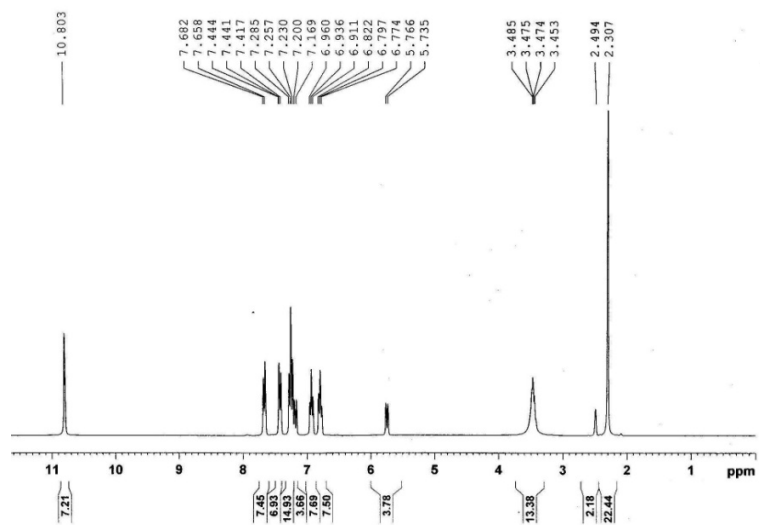

<sup>1</sup>H NMR, 300 MHz, DMSO-D<sub>6</sub>

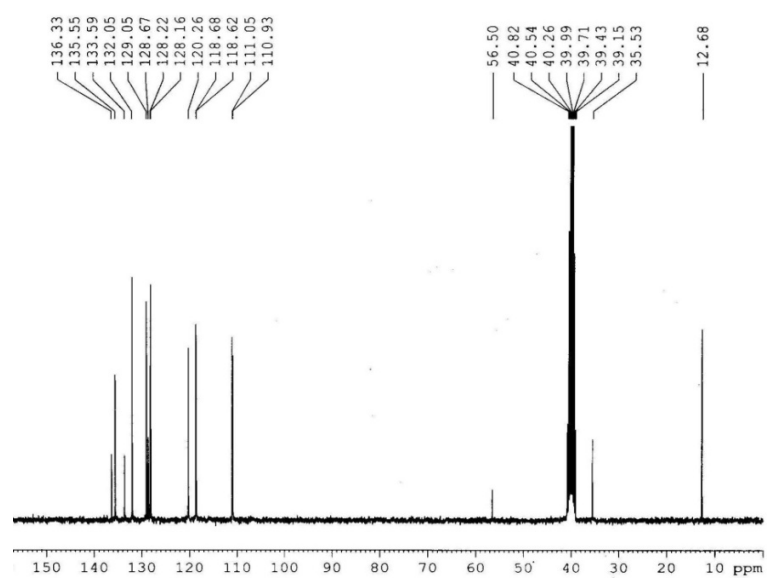

<sup>13</sup>C NMR, 75 MHz, DMSO-D<sub>6</sub>

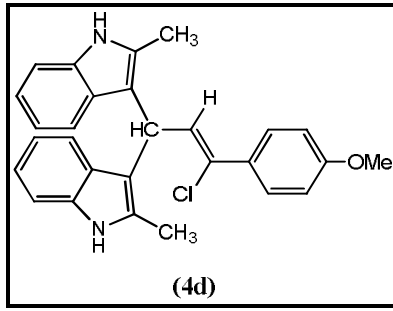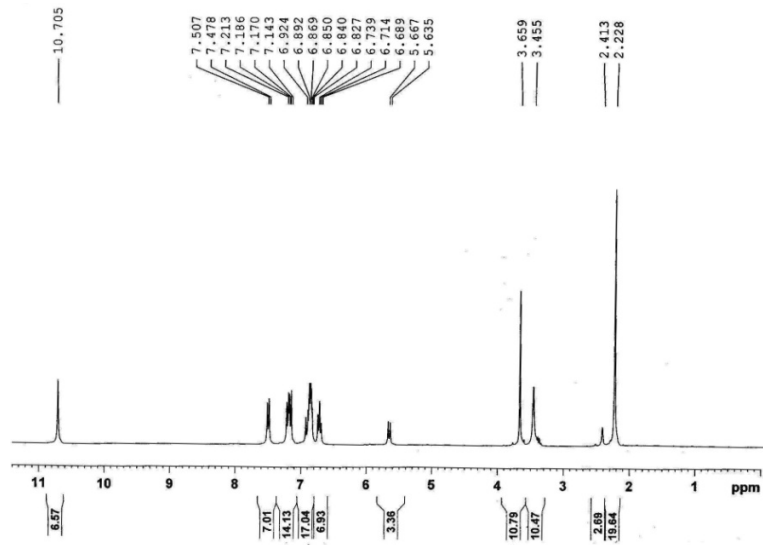

<sup>1</sup>H NMR, 300 MHz, DMSO-D<sub>6</sub>

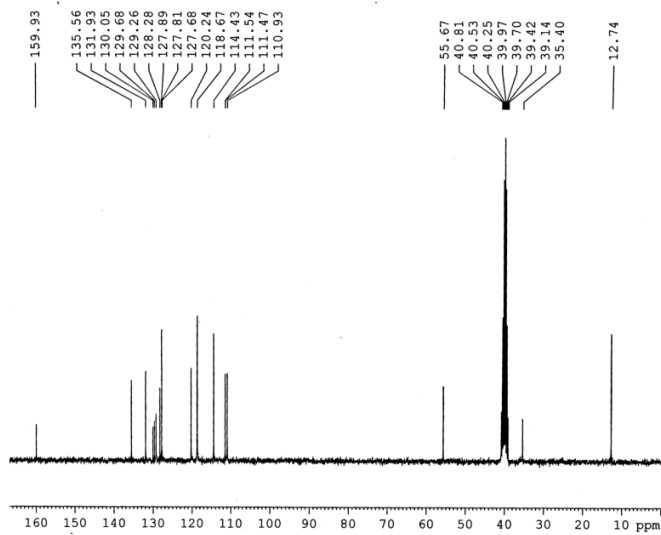

<sup>13</sup>C NMR, 75 MHz, DMSO-D<sub>6</sub>

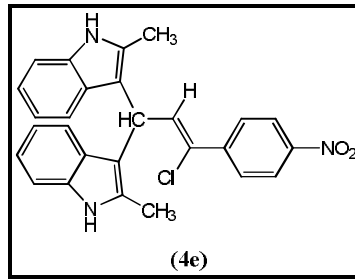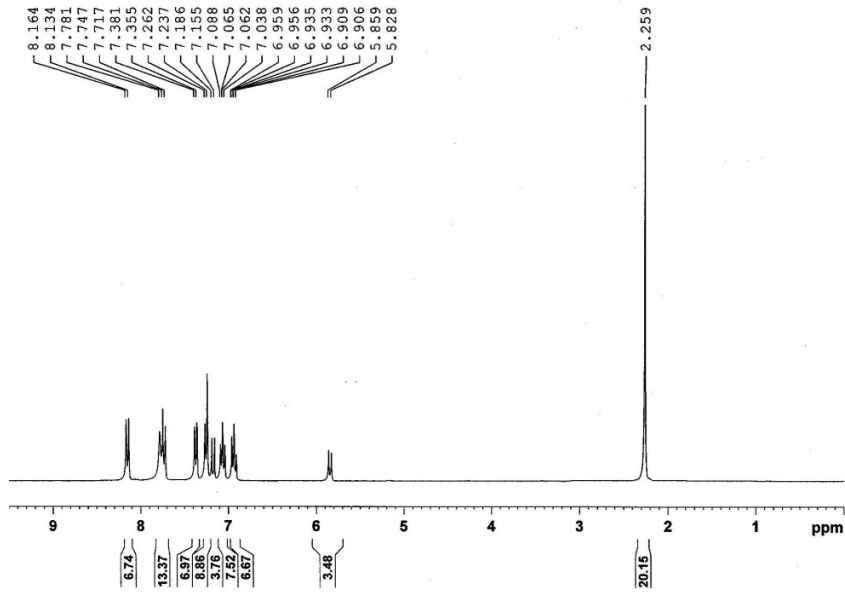

<sup>1</sup>H NMR, 300 MHz, CDCl<sub>3</sub>

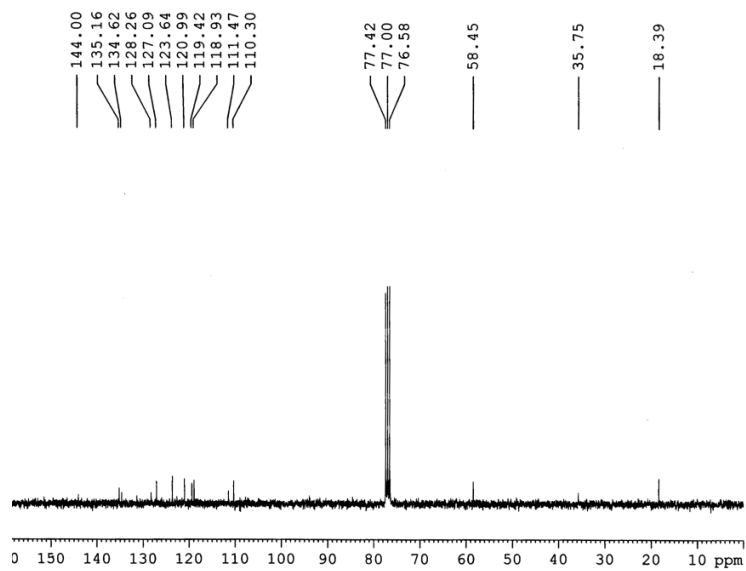

<sup>13</sup>C NMR, 75 MHz, CDCl<sub>3</sub>

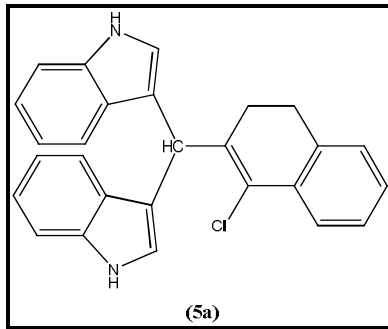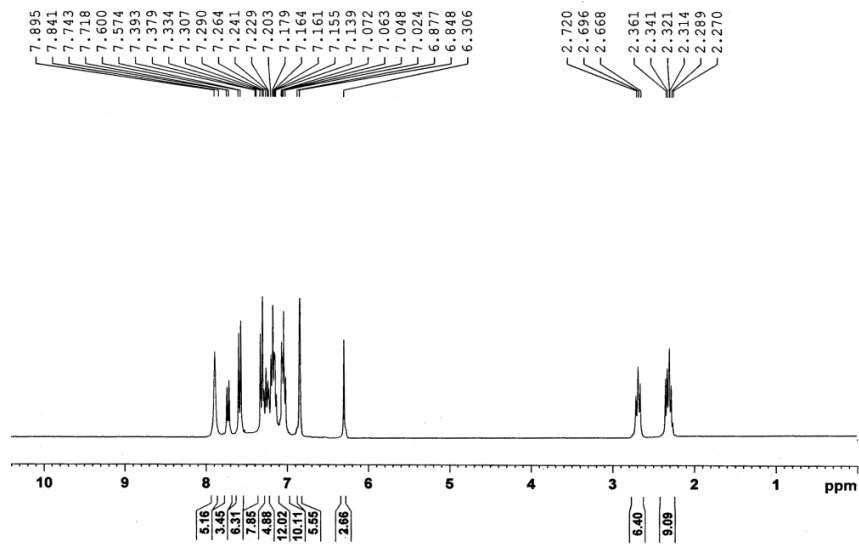

<sup>1</sup>H NMR, 300 MHz, CDCl<sub>3</sub>

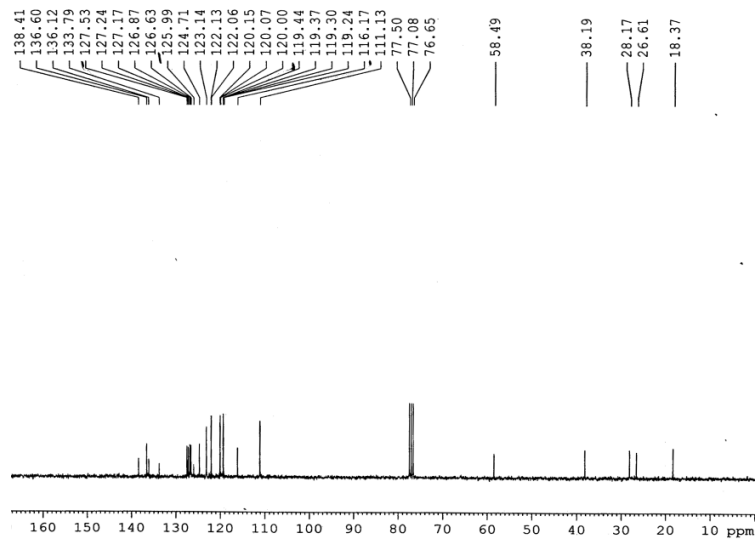

<sup>13</sup>C NMR, 75 MHz, CDCl<sub>3</sub>

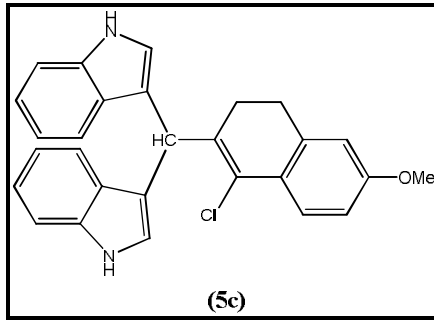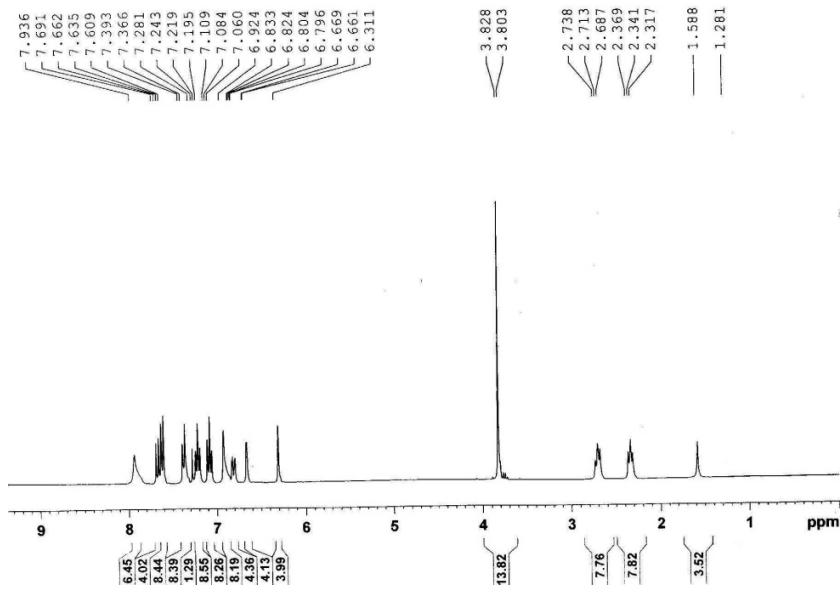

<sup>1</sup>H NMR, 300 MHz, CDCl<sub>3</sub>

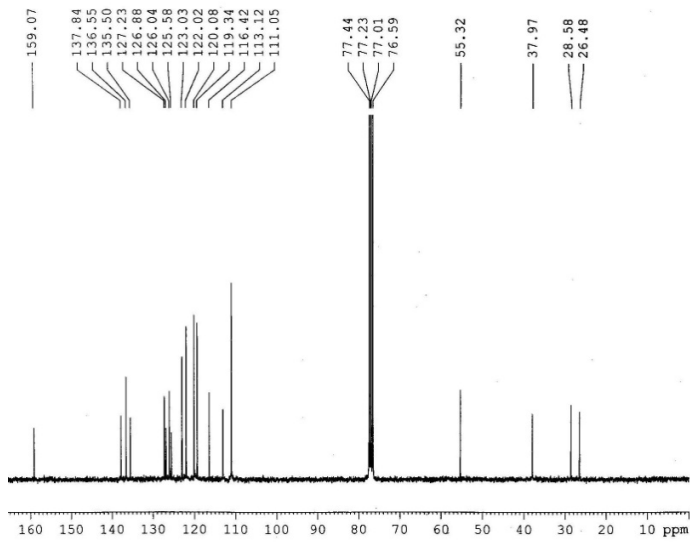

<sup>13</sup>C NMR, 75 MHz, CDCl<sub>3</sub>

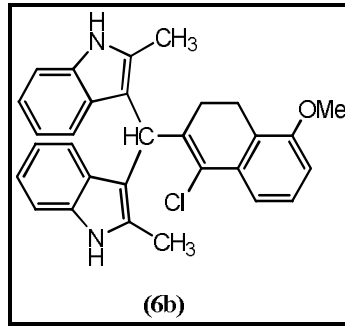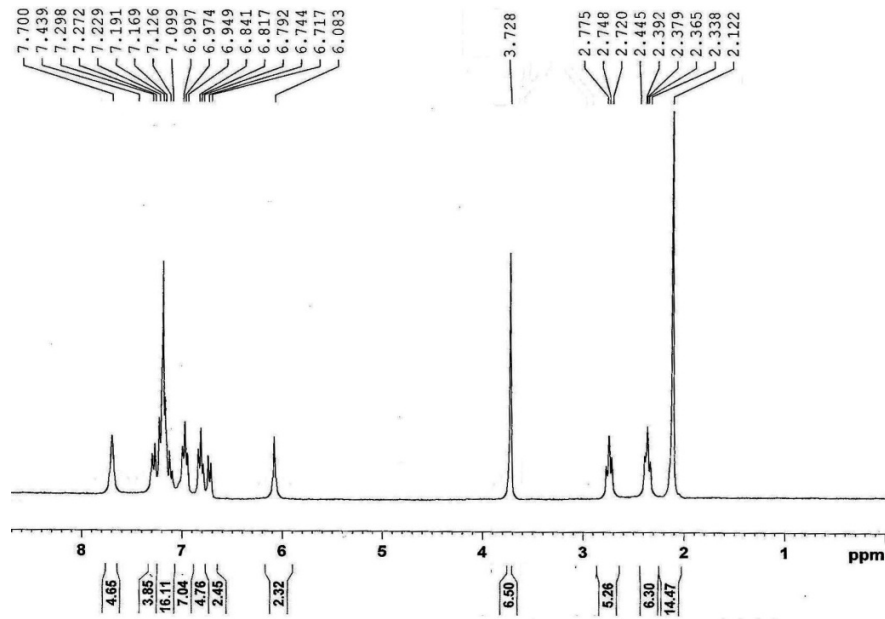

<sup>1</sup>H NMR, 300 MHz, CDCl<sub>3</sub>

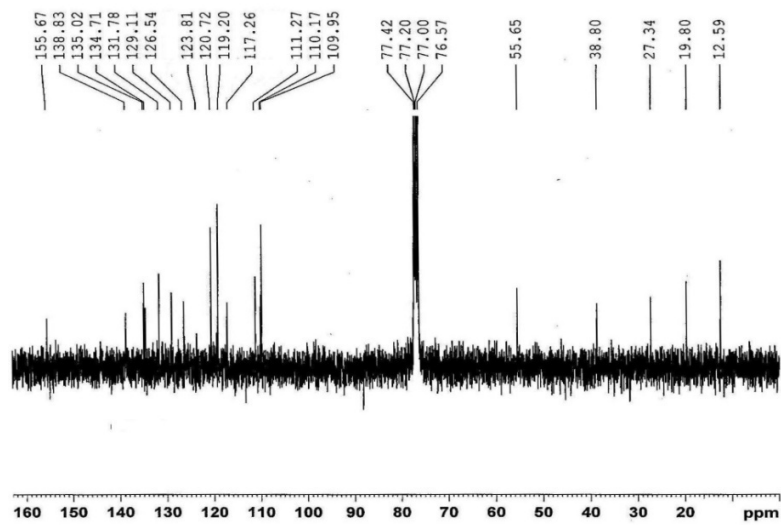

<sup>13</sup>C NMR, 75 MHz, CDCl<sub>3</sub>

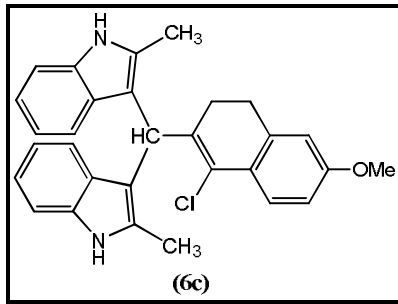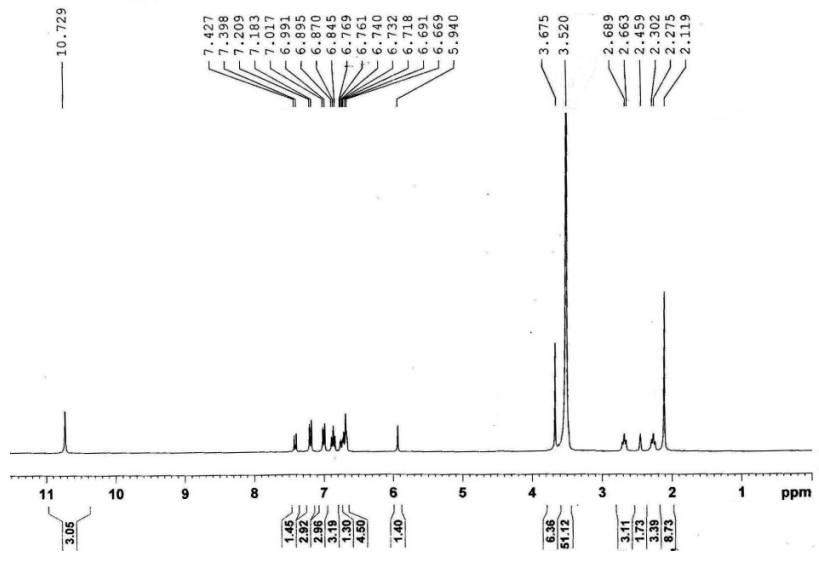

$^1\text{H}$  NMR, 300 MHz, DMSO- $\text{D}_6$

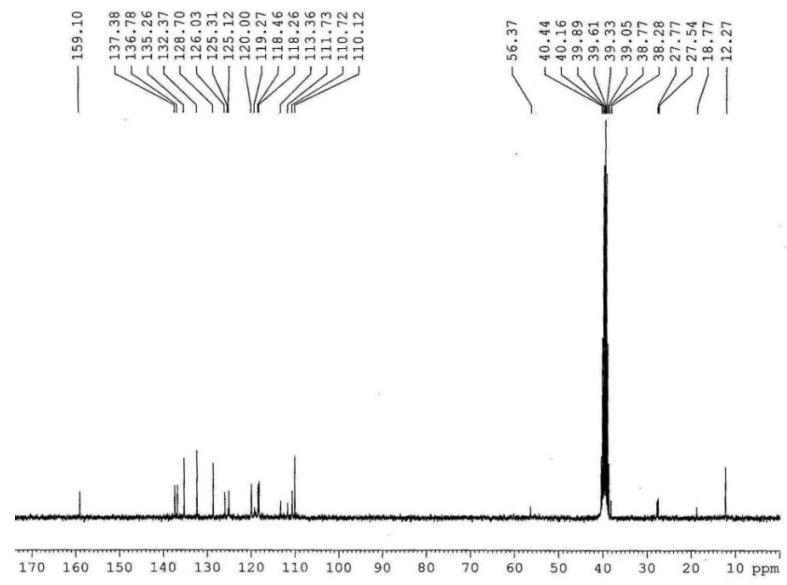

$^{13}\text{C}$  NMR, 75MHz, DMSO- $\text{D}_6$

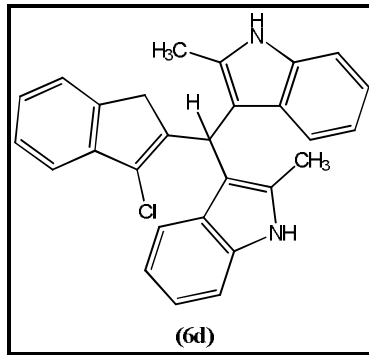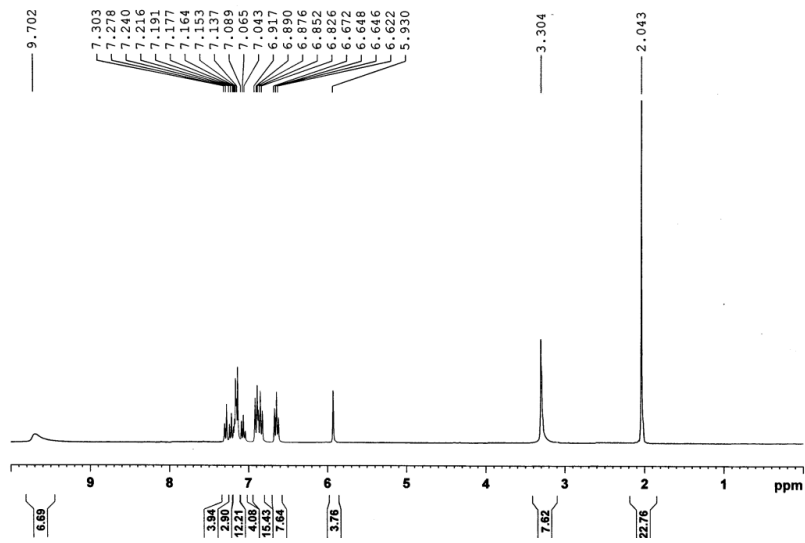

<sup>1</sup>H NMR, 300 MHz, CDCl<sub>3</sub>

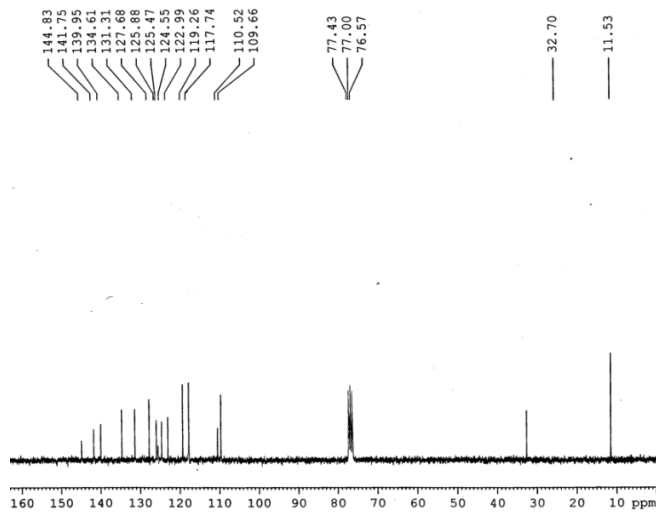

<sup>13</sup>C NMR, 75 MHz, CDCl<sub>3</sub>
